# Supplementary material for: International practice analysis of the negative list: Chinese Example of shipping market access
Source: Frontiers journal article supplement (doi:10.3389/fmars.2022.1088093), 2023-01-18
Supplement: Table_1.doc [file Table_1.doc]

**Table 1**

**Changes in the Scope of the Application of the Pilot Free Trade Zones and the National Versions of the Negative List of Foreign Investment Access (2013-2021)**

| List Name | Scope of Application | Announcement Time of List | Number of Special Management Measures | List System Structure | |
| --- | --- | --- | --- | --- | --- |
| Instruction | List of Special Management Measures |
| 2013 Negative List of Pilot Free Trade Zone | Shanghai | September 29, 2013 | 190 | No | Yes |
| 2014 Negative List of Pilot Free Trade Zone | Shanghai | July 1, 2014 | 139 | No | Yes |
| 2015 Negative List of Pilot Free Trade Zone | Shanghai, Tianjin, Guangdong, Fujian | April 8, 2015 | 122 | Yes, different | Yes |
| 2017 Negative List of Pilot Free Trade Zone | Shanghai, Tianjin, Guangdong, Fujian, Henan, Hubei, Liaoning, Shanxi, Sichuan, Zhejiang, Chongqing, Hainan | June 5, 2017 | 95 | Yes, different | Yes |
| 2018 Negative List of Pilot Free Trade Zone | Same as above | June 30, 2018 | 45 | Yes, same | Yes |
| 2019 Negative List of Pilot Free Trade Zone | Shanghai, Tianjin, Guangdong, Fujian, Henan, Hubei, Liaoning, Shanxi, Sichuan, Zhejiang, Chongqing, Hainan, Shandong, Jiangsu, Guangxi, Hebei, Yunnan, Heilongjiang | June 30, 2019 | 37 | Yes, same | Yes |
| 2020 Negative List of Pilot Free Trade Zone | Same as above | June 23, 2020 | 30 | Yes, different | Yes |
| 2021 Negative List of Pilot Free Trade Zone | Shanghai, Tianjin, Guangdong, Fujian, Henan, Hubei, Liaoning, Shanxi, Sichuan, Zhejiang, Chongqing, Hainan, Shandong, Jiangsu, Guangxi, Hebei, Yunnan, Heilongjiang, Beijing, Hunan, Anhui | December 27, 2021 | 27 | Yes, different | Yes |
| 2018 Negative List of Foreign Investment Access | Nationwide | June 28, 2018 | 48 | Yes | Yes |
| 2019 Negative List of Foreign Investment Access | June 30, 2019 | 40 | Yes | Yes |
| 2020 Negative List of Foreign Investment Access | June 23, 2020 | 33 | Yes | Yes |
| 2021 Negative List of Foreign Investment Access | December 27, 2021 | 31 | Yes, different | Yes |

Source: Recent Negative List Documents on the Official Website of the State Council
